# Supplementary material
Source: HighWire-hosted journal article supplement (http://cmaj.ca/highwire/filestream/150452/field_highwire_adjunct_files/1/231166-res-2-at.pdf)
Supplement: 231166-res-2-at.pdf [file 231166-res-2-at.pdf]

## Appendix 2: COVID Period Analysis of Work Hours

Table 1A below provides the mean weekly hours worked and the standard error of the mean (SEM) by quarter for the 2015-2019 pre-Covid period and the 2020 and 2021 post-Covid period. Data is provided for male physicians, female physicians, and all physicians. The data are converted to an index, with the 2015-2019 period serving as the base for comparison.

**Table 1A: Mean Weekly Hours and SEM, by Physician Sex and Quarter**

|                         | 2015 - 2019 Means Hours |       |       |       | 2020 Hours |       |       |       | 2021 Hours |       |       |       |
|-------------------------|-------------------------|-------|-------|-------|------------|-------|-------|-------|------------|-------|-------|-------|
|                         | Q1                      | Q2    | Q3    | Q4    | Q1         | Q2    | Q3    | Q4    | Q1         | Q2    | Q3    | Q4    |
| <b>All MDs- Mean</b>    | 41.41                   | 43.45 | 39.80 | 41.42 | 38.80      | 37.14 | 40.60 | 41.35 | 44.07      | 43.39 | 41.83 | 42.12 |
| <b>SEM</b>              | 0.497                   | 0.453 | 0.498 | 0.442 | 1.100      | 1.019 | 1.243 | 1.213 | 1.051      | 1.069 | 1.317 | 1.074 |
| <b>Male MDs- Mean</b>   | 44.10                   | 45.77 | 41.54 | 43.30 | 42.86      | 40.50 | 46.02 | 46.36 | 47.40      | 44.76 | 42.80 | 43.02 |
| <b>SEM</b>              | 0.662                   | 0.579 | 0.659 | 0.582 | 1.549      | 1.413 | 1.722 | 1.684 | 1.352      | 1.492 | 1.863 | 1.577 |
| <b>Female MDs- Mean</b> | 38.21                   | 40.78 | 37.78 | 39.17 | 33.75      | 32.57 | 34.58 | 36.49 | 40.16      | 41.79 | 40.87 | 41.23 |
| <b>SEM</b>              | 0.739                   | 0.705 | 0.755 | 0.669 | 1.473      | 1.385 | 1.683 | 1.673 | 1.59       | 1.52  | 1.87  | 1.46  |

| Index of Hours (2015-2019 Index==100) |      |      |       |       |       |       |       |       |
|---------------------------------------|------|------|-------|-------|-------|-------|-------|-------|
| <b>All</b>                            | 93.7 | 85.5 | 102.0 | 99.8  | 106.4 | 99.9  | 105.1 | 101.7 |
| <b>Male</b>                           | 97.2 | 88.5 | 110.8 | 107.1 | 107.5 | 97.8  | 103.0 | 99.4  |
| <b>Female</b>                         | 88.3 | 79.9 | 91.5  | 93.1  | 105.1 | 102.5 | 108.2 | 105.2 |
